# Supplementary material for: Low-Energy Extracorporeal Shock Wave Therapy Ameliorates Kidney Function in Diabetic Nephropathy
Source: Hindawi journal article supplement (doi:10.1155/2019/8259645), 2019-07-04

Supplemental Information

**Low-Energy Extracorporeal Shock Wave Therapy Ameliorates Kidney Function  
in Diabetic Nephropathy**

Chang-Chun Hsiao, Wei-Han Huang, Kuang-Hung Cheng, Chien-Te Lee

**FIGURE LEGENDS**

**Supplemental Figure 1.** Illustration of a low-energy extracorporeal shock wave therapy (ESWT) experiment set-up. (a) Using ultrasound probe and ultrasound system localizes for kidney position. (b) Ultrasound kidney image. (c) Low-energy ESWT treatment zone along the kidney. (d) ultrasound system. (e) Low-energy extracorporeal shock wave system.

**Supplemental Figure 2.** (a) Blood glucose (mg/dl). (b) Body weight. Data are represented as mean  $\pm$  SEM (N = 10); ‡p<0.005 versus normal group.

# Supplemental Figure 1

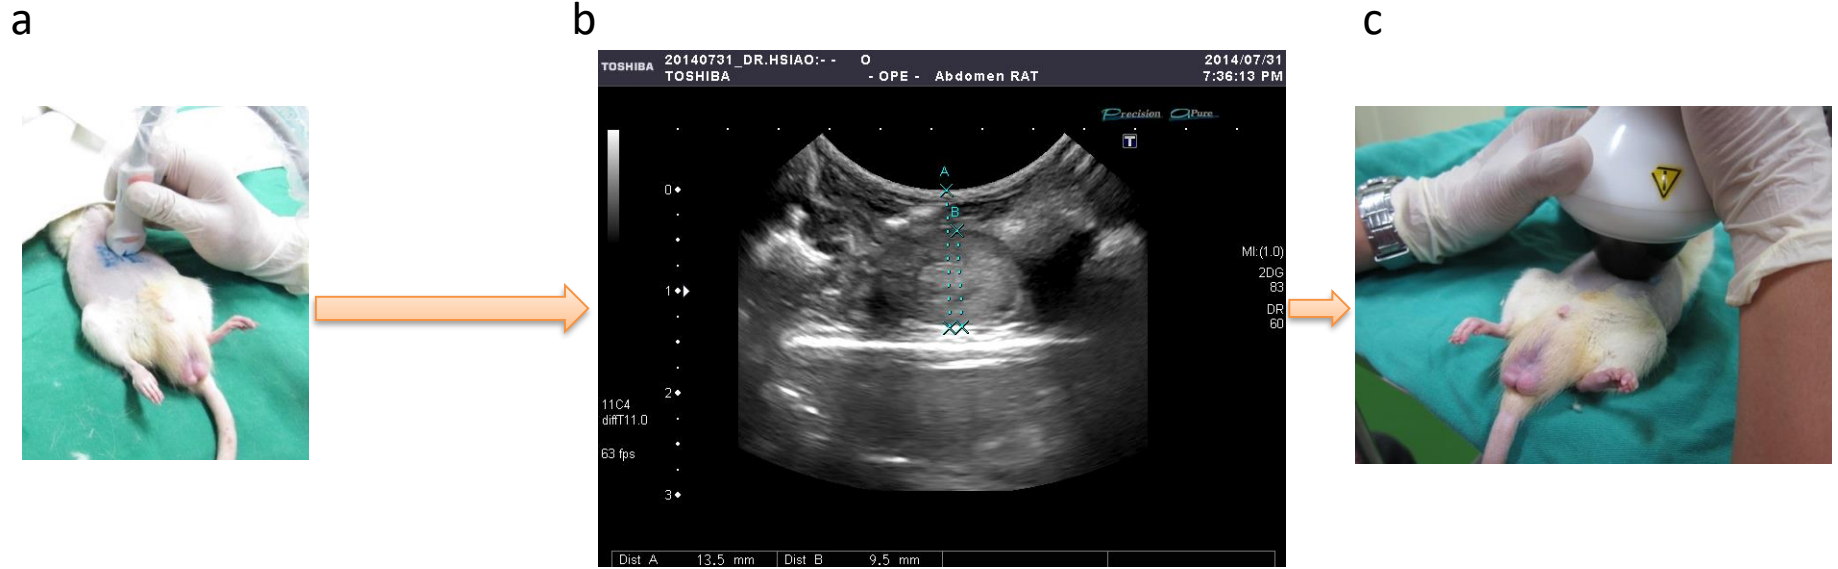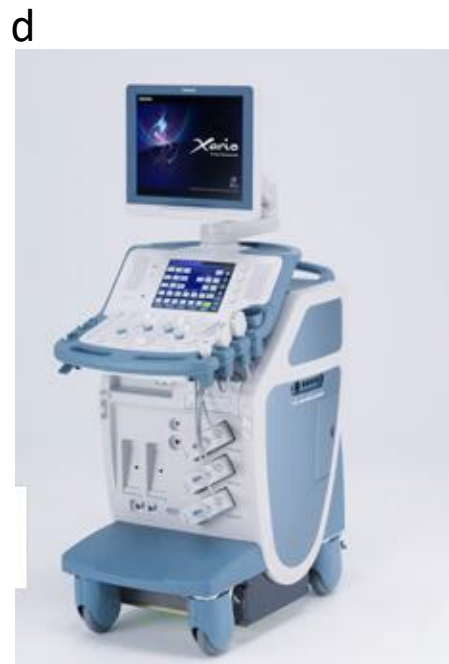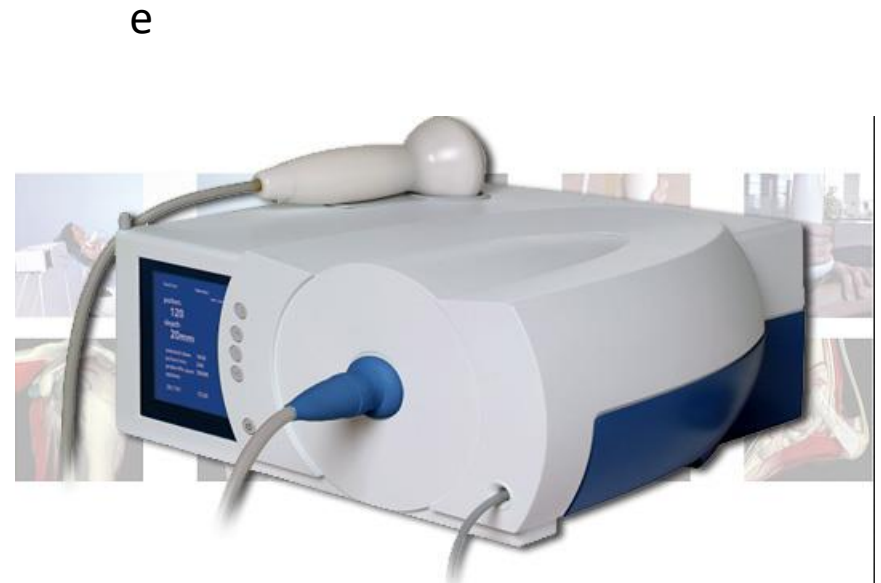

# Supplemental Figure 2

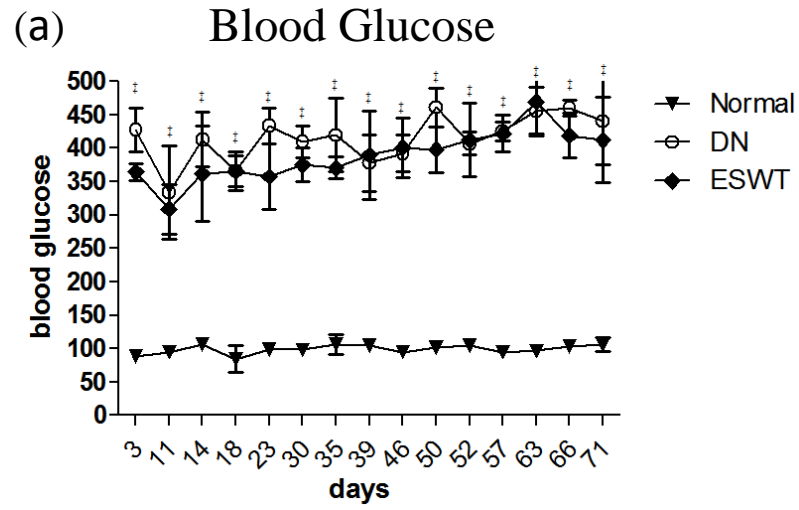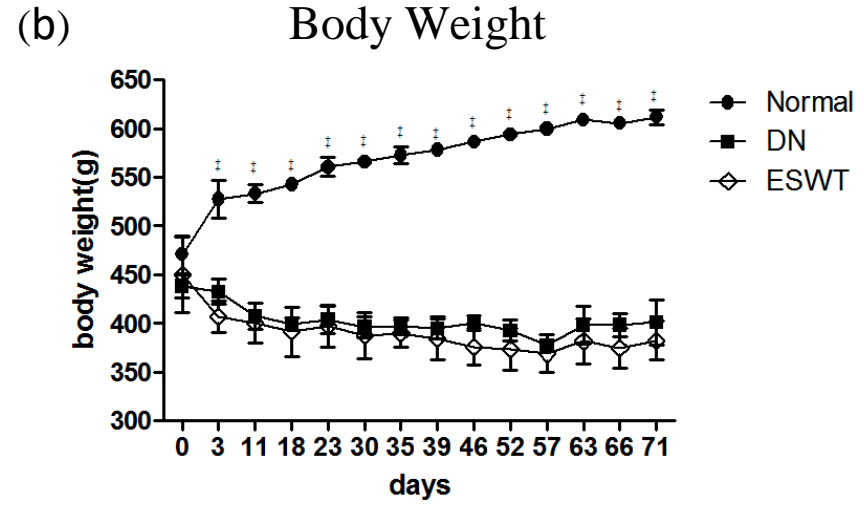

Supplement: f1 [file 8259645.f1.pdf]
